# Supplementary material for: (La0.65Sr0.3)0.95FeO3−δ perovskite with high oxygen vacancy as efficient bifunctional electrocatalysts for Zn–air batteries
Source: RSC Adv. 2021 Dec 6;11(62):38977–81. doi: 10.1039/d1ra07920d (PMC9044435; doi:10.1039/d1ra07920d)
Supplement: RA-011-D1RA07920D-s001 [file RA-011-D1RA07920D-s001.pdf]

## Supporting Information

### **(La<sub>0.65</sub>Sr<sub>0.3</sub>)<sub>0.95</sub>FeO<sub>3-δ</sub> perovskite with A-site deficiency as efficient bifunctional electrocatalysts for Zn-air batteries**

Liyang Luo,<sup>a</sup> Zhongyi Liu,<sup>a</sup> and Zhiyuan Wang,<sup>\*b,c</sup>

<sup>a</sup>College of Chemistry, Zhengzhou University, Zhengzhou 450001, China.

<sup>b</sup>Henan Institute of Advanced Technology, Zhengzhou University, Zhengzhou 450001, China.

<sup>c</sup> Institute of Physical Chemistry, RWTH Aachen University, 52074 Aachen, Germany

## Experimental Section

### Chemicals

$\text{La}_2\text{O}_3$  (99.99%),  $\text{SrCO}_3$  ( $\geq 99.9\%$ ),  $\text{Fe}_2\text{O}_3$  ( $\geq 99\%$ ) and isopropanol (99.8%) were purchased from Sigma-Aldrich. All chemicals were used as received without further purification. Deionized (DI) water from Milli-Q System (Millipore, Billerica, MA) was used in all our experiments.

### Materials preparation

$(\text{La}_{0.65}\text{Sr}_{0.3})_{0.95}\text{FeO}_{3-\delta}$  oxides were synthesized by a solid-state method. In a typical synthesis, according to the composition of  $(\text{La}_{0.65}\text{Sr}_{0.3})_{0.95}\text{FeO}_{3-\delta}$ ,  $\text{La}_2\text{O}_3$ ,  $\text{SrCO}_3$ ,  $\text{Fe}_2\text{O}_3$  and 100 ml isopropanol were mixed with a certain molar ratio and ball-milled for 5 h at 250 rpm. Then the isopropanol was evaporated under vacuum at 60 °C and the obtained mixture was dried at 80 °C overnight. The dried mixture was calcined in Muffle furnace at designed temperature under air for 8 h with a heating rate of 5 °C/min, after cooling down to the room temperature, the sample was grinded and stored for further use. Based on the calcined temperature, the samples were named as LSF0.95-900°C, LSF0.95-1000°C, LSF0.95-1100°C and LSF0.95-1200°C, respectively.

### Materials characterization

Powder X-ray diffraction patterns were recorded on a PANalytical operating at 40 KV voltage and 15 mA current with Cu K $\alpha$  radiation ( $\lambda=1.5418$  Å). Rietveld refinement<sup>19</sup> of X-ray data was carried out by the FULLPROF code. Scanning electron microscope (SEM) was recorded on a Quanta FEG 650 at 20kV. The specific surface area was obtained by Brunauer-Emmett-Teller (BET) method from  $\text{N}_2$  adsorption/desorption isotherms at 77 K in a relative pressure range from 0.1 to 0.3 (Quanta Chrome Instruments, USA). The particle size distributions were analyzed by laser diffraction particle size analyzer (HORIBA, LA-960). The chemical compositions were detected by inductively coupled plasma with optical emission spectroscopy (ICP-OES) (Thermo Scientific iCAP7600). X-ray photoelectron spectroscopy (XPS) was collected on ULVAC-Phi 5000 instrument equipped with an Al K $\alpha$  source (1.486 keV).

### Electrode preparation

The thin-film working electrode was prepared by depositing 2  $\mu\text{l}$  well-dispersed catalyst ink on the RDE glassy carbon (GC) electrode (3 mm, ALS Co., Ltd) and dried at room temperature. For the RRDE GC electrode (4 mm, ALS Co., Ltd), 5  $\mu\text{l}$  catalyst ink was deposited. The catalyst loading for RDE and RRDE is  $3.77 \times 10^{-2} \text{ mg cm}^{-2}$ . The catalyst ink was prepared by dispersing 10 mg catalyst and 80  $\mu\text{l}$  5 wt% Nafion (Aldrich) into 450  $\mu\text{l}$  solvent (Vethanol: VDI-water = 1:1) and sonicated for 1 h. Before each use GC electrodes were polished with 1  $\mu\text{m}$  polishing diamond and 0.05  $\mu\text{m}$  polishing alumina (PK-3 electrode

polishing kit, ALS Co., Ltd). By comparison, the working electrodes of LSF0.95/C (consist of 80 wt% LSF0.95 and 20 wt% Vulcan XC-72), commercial Pt/C (20 wt% Pt and 80 wt% Vulcan XC-72 carbon, electrochemical purity, Sigma-Aldrich) and RuO<sub>2</sub>/C (80 wt% RuO<sub>2</sub> and 20 wt% Vulcan XC-72 carbon, electrochemical purity, Sigma-Aldrich) were prepared by the same method with (La<sub>0.65</sub>Sr<sub>0.3</sub>)<sub>0.95</sub>FeO<sub>3-δ</sub> catalysts. All the current density (mA cm<sup>-2</sup>) showed in this paper was calculated from electrode geometric surface area without special noting.

### Electrochemical measurement

Electrochemical measurements were performed with RRDE-3A (ALS Co., Ltd) and SP-300 (Bio-Logic) potentiostat by a standard three-electrode system in 0.1 M KOH solution at room temperature, using the prepared GC electrode as the working electrode, a Pt wire as the counter electrode, and a Hg/HgO (1 M NaOH) as the reference electrode. Before each test, the KOH was saturated with oxygen for at least 30 min. Cyclic voltammetry (CV) and linear sweep voltammetry (LSV) were performed at a scan rate of 10 mV s<sup>-1</sup>. All current densities (mA cm<sup>-2</sup>) shown in this paper are calculated from the geometric area of the electrode without special noting. The overall electron transfer number during ORR was obtained from Koutecky-Levich plots:

$$\frac{1}{j} = \frac{1}{j_k} + \frac{1}{j_d} = -\frac{1}{nFkC^0} - \frac{1}{0.21nFD^{2/3}\nu^{-1/6}C^0\omega^{1/2}}$$

$$\text{And, } B = -\frac{1}{0.62nFC^0D^{2/3}\nu^{-1/6}}$$

Where  $j$ ,  $j_k$  and  $j_d$  are the measured current density, the kinetic current density and the limiting current density (mA cm<sup>-2</sup>), respectively;  $F$  is the Faraday constant (96485 C·mol<sup>-1</sup>);  $D$  is the diffusion coefficient of oxygen in 0.1 M KOH at room temperature (1.73×10<sup>-5</sup> cm<sup>2</sup>·s<sup>-1</sup>);  $C^0$  is the saturated concentration of oxygen in 0.1M KOH (1.14×10<sup>-6</sup> mol·cm<sup>-3</sup>);  $n$  is the number of electrons transferred per oxygen molecule;  $\omega$  is the rotating speed in rpm;  $\nu$  is the kinetic viscosity of the solution at room temperature (0.01 cm<sup>2</sup>·s<sup>-1</sup>);  $k$  is the rate constant.

All kinetic current densities  $j_k$  for ORR Tafel plots were corrected by the following equation:

$$j_k = j * j_d / (j_d - j)$$

The electrochemical active surface areas (ECSA) of the LSF0.95 catalysts were estimated by measuring the electrochemical capacitance of the electrode-electrolyte interface in the non-faradaic region of cyclic voltammetry<sup>20, 21</sup>. The ECSA of the catalyst was calculated as:

$$ECSA = C_{dl}/C_s$$

$$i_{dl} = C_{dl} \times v$$

Where  $C_{dl}$  is the specific capacitance of the electrode double layer (mF);  $v$  ( $V s^{-1}$ ) is the scan rate;  $C_s$  is the specific capacitance in 0.1 M KOH<sup>21</sup>.

All potentials in this paper were converted to the reversible hydrogen electrode (RHE) *via* Nernst equation:

$$E_{RHE} = E_{Hg/HgO} + 0.059 V \times pH + E^{\circ}_{Hg/HgO}$$

Where  $E_{Hg/HgO}$  is the measured potential and the  $E^{\circ}_{Hg/HgO}$  is the standard potential of Hg/HgO at 25 °C (0.098 V).

### **Zn-air battery performance**

Primary Zn-air batteries were tested in home-built electrochemical cells, where 6.0 M KOH was used as the electrolyte, and a zinc plate (thickness = 0.25 mm) as the anode. The cathode was prepared by uniformly coating the prepared catalytic ink onto carbon paper; the mass loading was 2 mg cm<sup>-2</sup>, followed by drying at 60 °C overnight.

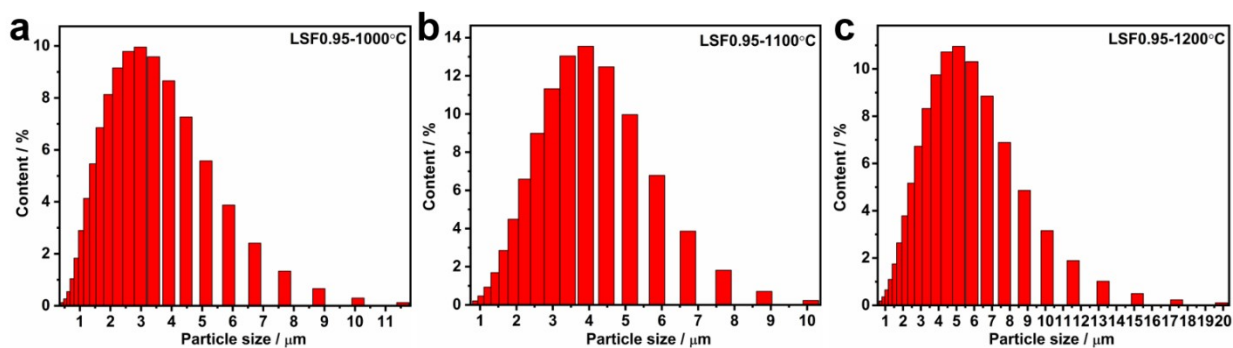

**Figure S1.** Histograms of particle size distribution for LSF0.95 calcined at 1000 °C (a), 1100 °C (b) and 1200 °C (c).

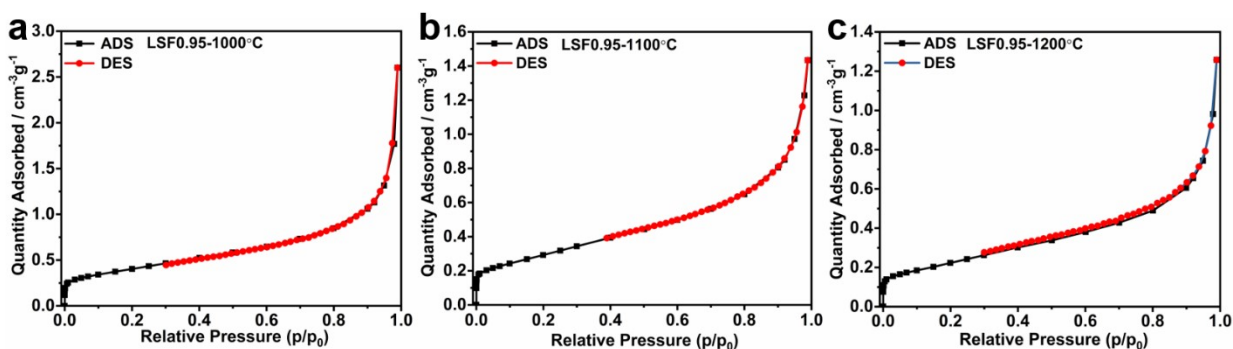

**Figure S2.** Nitrogen adsorption-desorption isotherms of the LSF0.95 catalysts calcined at 1000 °C (a), 1100 °C (b) and 1200 °C (c).

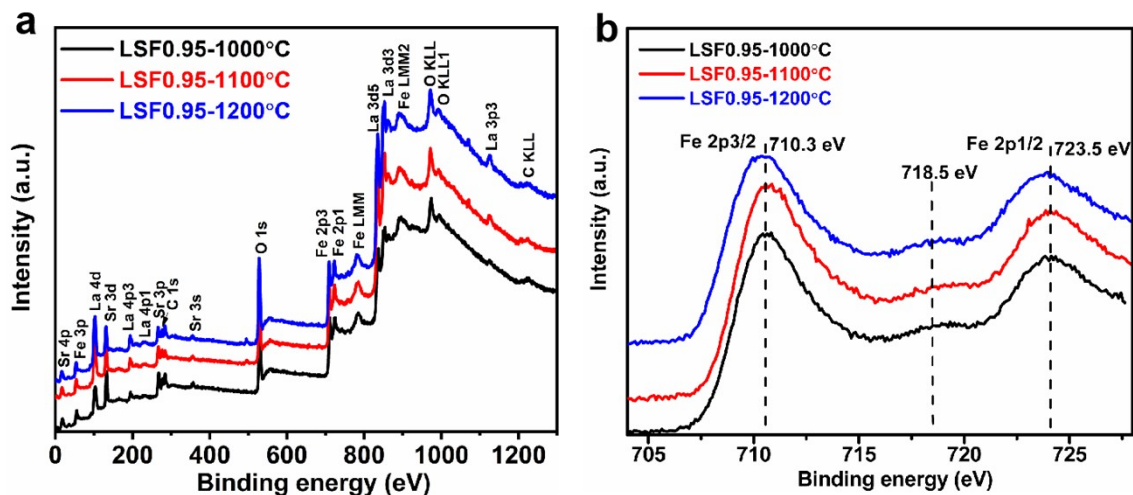

**Figure S3.** (a) XPS survey scans of the LSF0.95 catalysts. (b) High resolution XPS spectra of Fe for LSF0.95 catalysts.

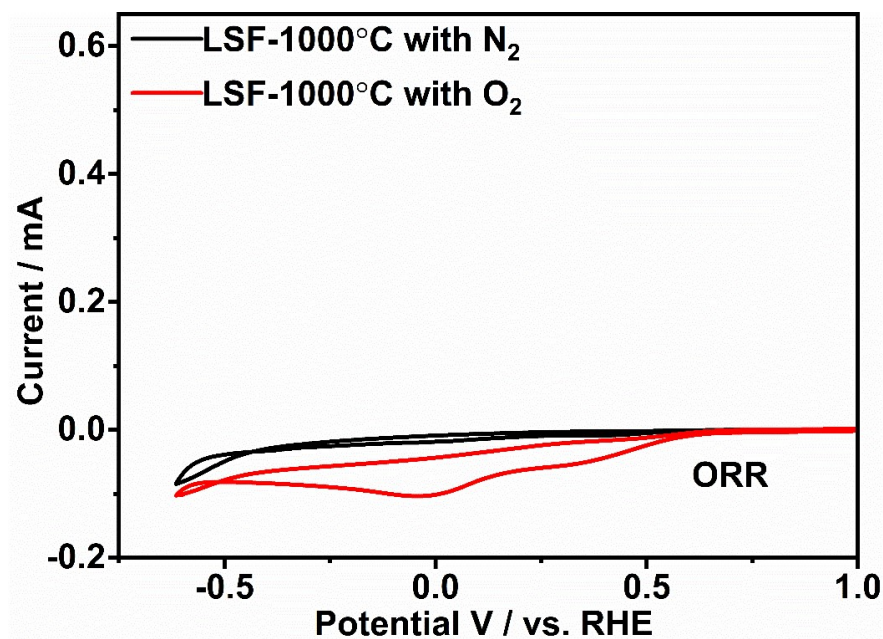

**Figure S4.** CV curve of the LSF0.95 catalyst on RDE in N<sub>2</sub> and O<sub>2</sub> saturated 0.1 M KOH at a scan rate of 10 mV/s.

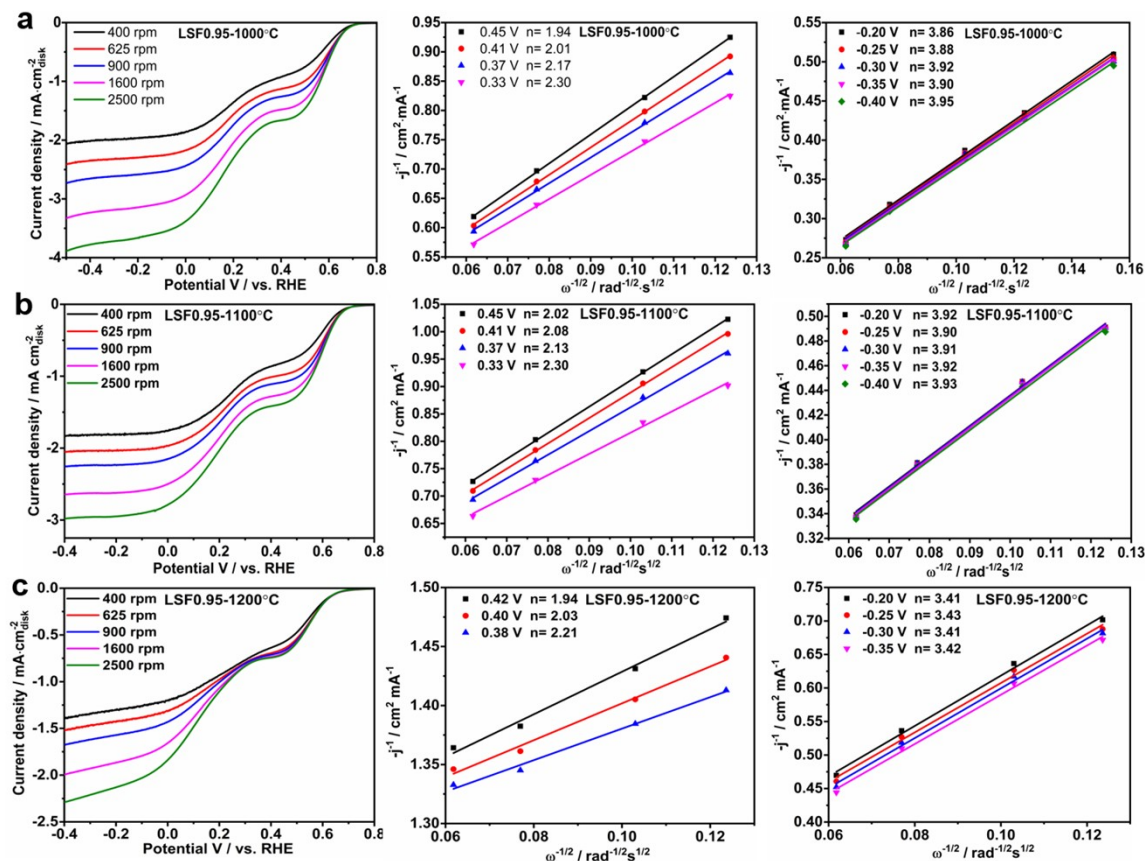

**Figure S5.** LSV curves on RDE at different rotation speed in O<sub>2</sub> saturated 0.1 M KOH at a scan rate of 10 mV·s<sup>-1</sup> and K-L plots of two oxygen reduction ranges for: LSF0.95-1000°C (a), LSF0.95-1100°C (b), LSF0.95-1200°C (c).

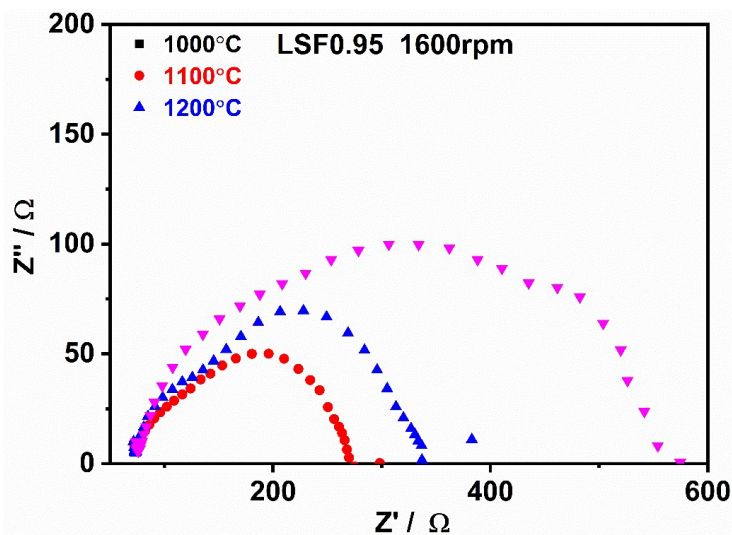

**Figure S6.** EIS of LSF0.95 catalysts recorded at 1.68 V versus RHE under the influence of an AC voltage of 10 mV.

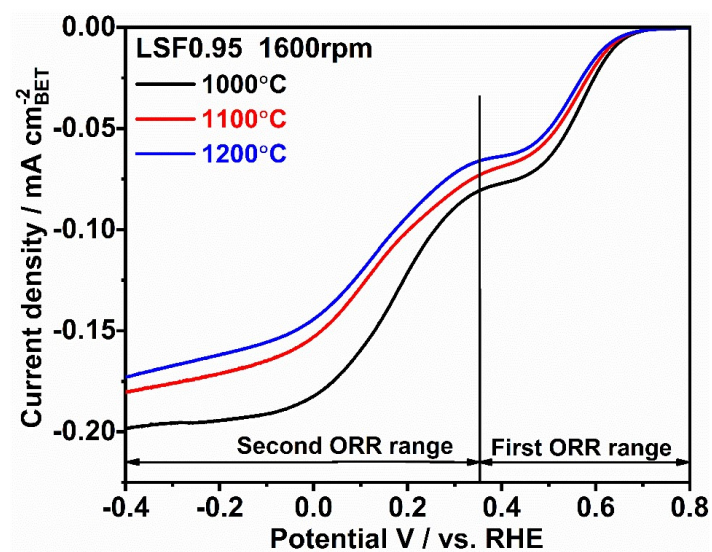

**Figure S7.** ORR specific activities of LSF0.95 catalysts per BET surface area.

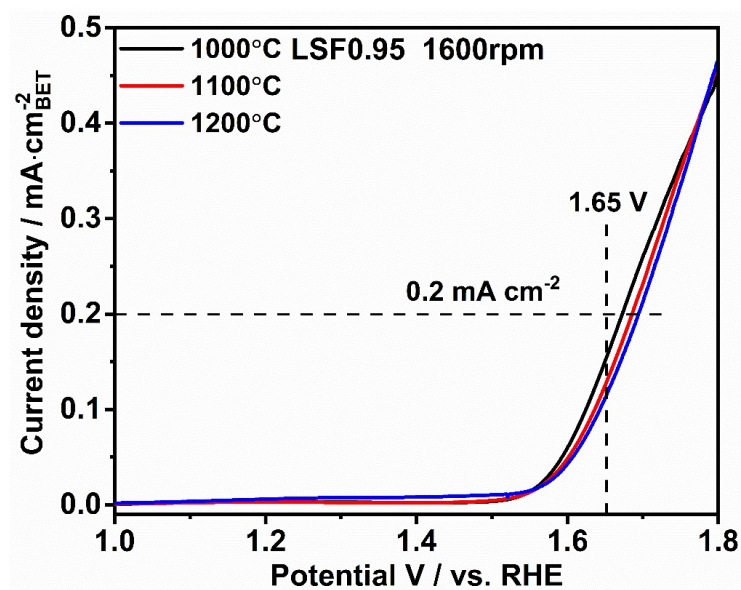

**Figure S8.** OER specific activities of the LSF0.95 catalysts per BET surface area.

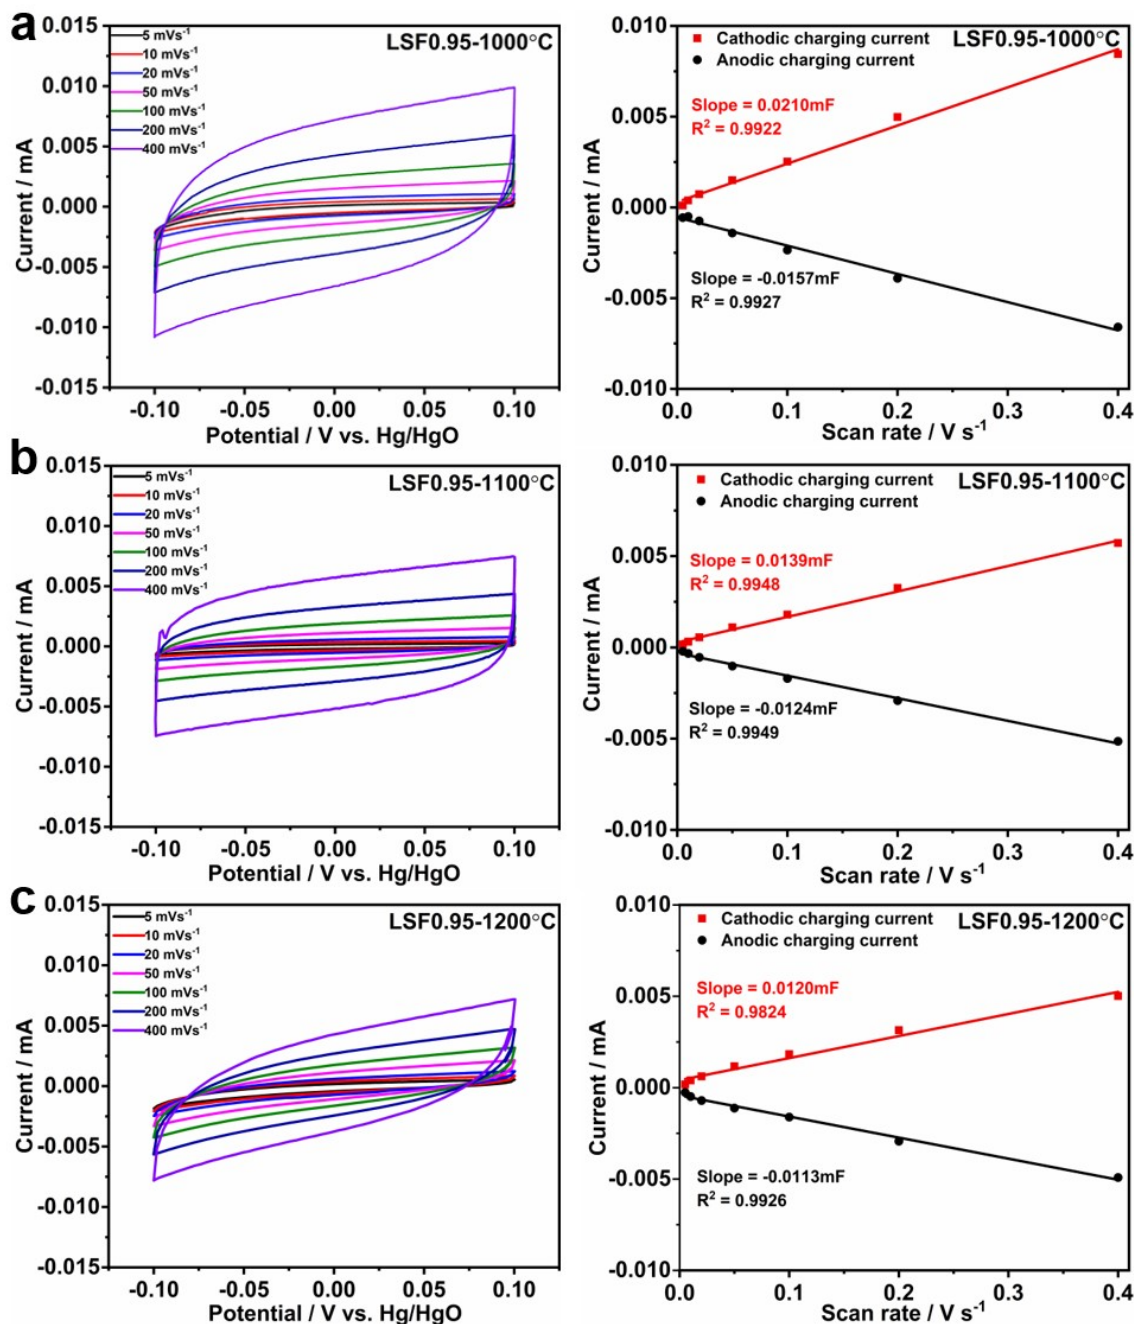

**Figure S9.** Double-layer capacitance measurements for determining electrochemical active surface area for LSF0.95 catalysts from CV in N<sub>2</sub> saturated 0.1 M KOH. The double layer capacitance is taken as the average of the absolute value of the slope of the linear fits to the data.

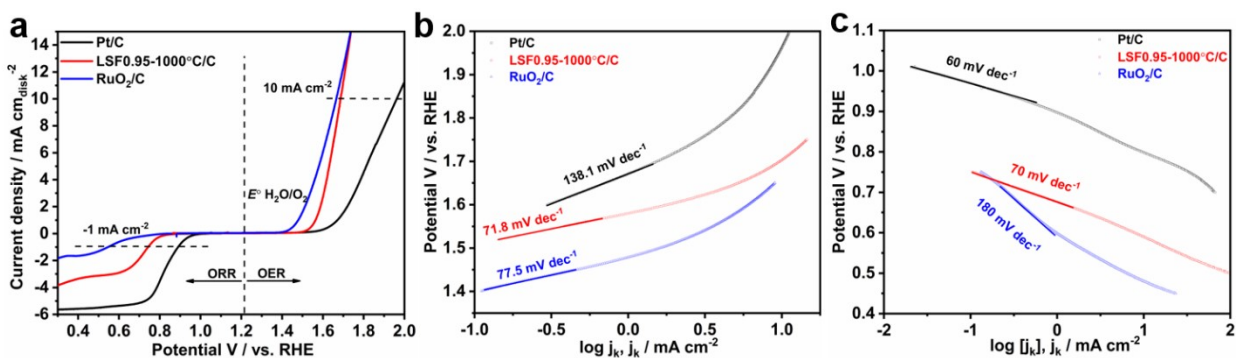

**Figure S10.** (a) The comparison of ORR and OER LSV curves for the Pt/C, LSF0.95/C (1000 °C) and RuO<sub>2</sub>/C in O<sub>2</sub> saturated 0.1 M KOH. Tafel plots of Pt/C, LSF0.95/C (1000 °C) and RuO<sub>2</sub>/C obtained from ORR (b) and OER (c) LSV curves.

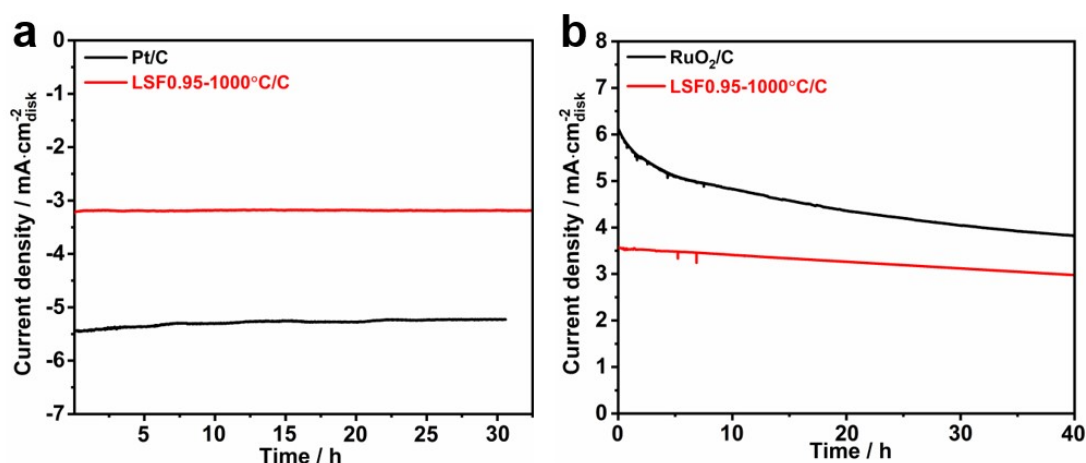

**Figure S11.** (a) The Chronoamperometric (CA) measurements of Pt/C and LSF0.95/C (1000 °C) in O<sub>2</sub> saturated 0.1 M KOH at 1600 rpm and 0.18 V. (b) The Chronoamperometric (CA) measurements of RuO<sub>2</sub>/C and LSF0.95/C (1000 °C) in O<sub>2</sub> saturated 0.1 M KOH at 1600 rpm and 1.63 V.

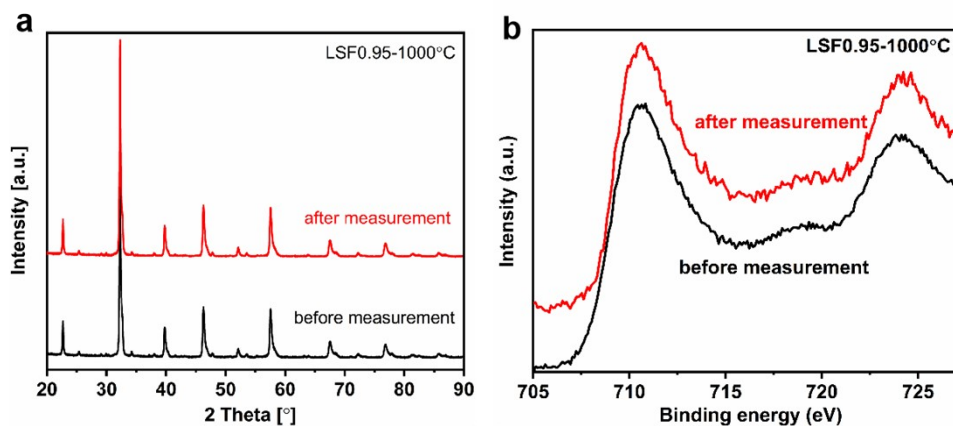

**Figure S12.** (a) The XRD patterns and (b) XPS spectra of Fe 2p species of LSF0.95-1000°C before and after electrochemical stability measurement.

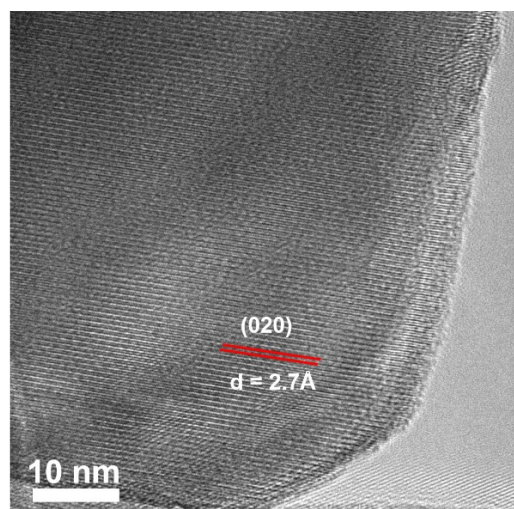

**Figure S13.** The HRTEM image of LSF0.95-1000°C after electrochemical stability measurement.

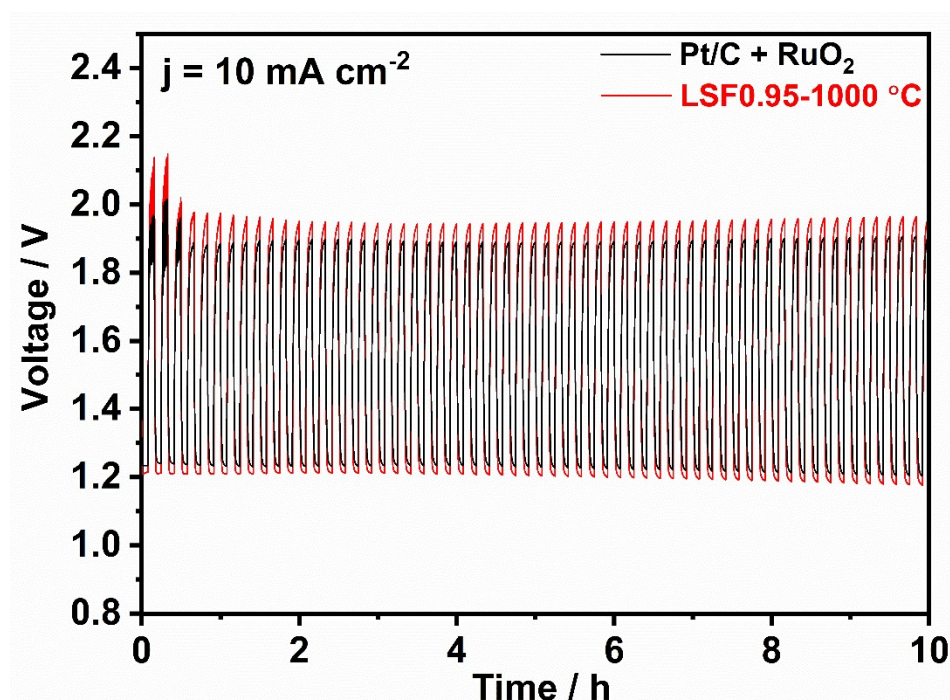

**Figure S14.** Cycling performance of the rechargeable Zn-air battery using LSF0.95-1000°C (red) compared with the one using Pt/C and RuO<sub>2</sub> (black).

**Table S1.** Chemical composition s of the  $(\text{La}_{0.65}\text{Sr}_{0.3})_{0.95}\text{FeO}_{3-\delta}$  catalysts prepared at 1000 °C, 1100 °C and 1200 °C.

| Nominal composition | The concentration of metal ions (mg ml <sup>-1</sup> ) |      |       |      |       |      | ICP-OES composition                                         |
|---------------------|--------------------------------------------------------|------|-------|------|-------|------|-------------------------------------------------------------|
|                     | La                                                     | SD   | Sr    | SD   | Fe    | SD   |                                                             |
| LSF0.95-1000 °C     | 40.36                                                  | 0.16 | 11.43 | 0.04 | 26.19 | 0.07 | $\text{La}_{0.6195}\text{Sr}_{0.2782}\text{FeO}_{3-\delta}$ |
| LSF0.95-1100 °C     | 40.33                                                  | 0.16 | 11.41 | 0.05 | 26.16 | 0.07 | $\text{La}_{0.6198}\text{Sr}_{0.2780}\text{FeO}_{3-\delta}$ |
| LSF0.95-1200 °C     | 40.31                                                  | 0.19 | 11.39 | 0.06 | 26.18 | 0.15 | $\text{La}_{0.6190}\text{Sr}_{0.2773}\text{FeO}_{3-\delta}$ |

Standard deviation is based on standard deviation of triplicate measurements.

**Table S2.** The specific surface areas of LSF0.95 perovskite catalysts.

| Sample          | $S_{\text{BET}}$ (m <sup>2</sup> g <sup>-1</sup> ) |
|-----------------|----------------------------------------------------|
| LSF0.95-1000°C  | 1.241                                              |
| LSF0.945-1100°C | 1.070                                              |
| LSF0.945-1200°C | 0.916                                              |

$S_{\text{BET}}$  : Specific surface area calculated by Brunauere-Emmette-Teller model.

**Table S3.** Iron valences, oxygen species of the different LSF0.95 catalysts analyzed by XPS.

| Sample | Fe <sup>3+</sup> (%) | Fe <sup>4+</sup> (%) | Lattice O <sup>2-</sup> (%) | Lattice O <sub>2</sub> <sup>2-</sup> /O <sup>-</sup> (%) | -OH/O <sub>2</sub> (%) | H <sub>2</sub> O (%) |
|--------|----------------------|----------------------|-----------------------------|----------------------------------------------------------|------------------------|----------------------|
| 1000°C | 59.91                | 40.09                | 47.35                       | 26.53                                                    | 21.68                  | 4.45                 |
| 1100°C | 50.92                | 49.08                | 48.37                       | 29.80                                                    | 17.63                  | 4.20                 |
| 1200°C | 41.22                | 58.78                | 40.74                       | 32.83                                                    | 22.58                  | 3.85                 |

**Table S4.** The content of oxygen vacancy and calculated formula based on XPS results.

| Sample | Fe <sup>3+</sup> (%) | Fe <sup>4+</sup> (%) | Oxygen vacancy / $\delta$ | Calculated formula                                            |
|--------|----------------------|----------------------|---------------------------|---------------------------------------------------------------|
| 1000°C | 59.91                | 40.09                | 0.0916                    | $(\text{La}_{0.65}\text{Sr}_{0.3})_{0.95}\text{FeO}_{2.9084}$ |
| 1100°C | 50.92                | 49.08                | 0.0467                    | $(\text{La}_{0.65}\text{Sr}_{0.3})_{0.95}\text{FeO}_{2.9533}$ |
| 1200°C | 41.22                | 58.78                | -0.0018                   | $(\text{La}_{0.65}\text{Sr}_{0.3})_{0.95}\text{FeO}_{3.0018}$ |

**Table S5.** Comparison of the bifunctional catalytic activity for LSF0.95 catalyst, precious-metal based and some other excellent perovskite bifunctional catalysts reported in the literatures. All the catalysts in the table were tested in oxygen saturated 0.1 M KOH solution.

| Catalysts                                                                                                          | $E_{\text{ORR}}$ (V)<br>at -1 mA cm <sup>-2</sup> | $E_{\text{OER}}$ (V)<br>at 10 mA cm <sup>-2</sup> | $\Delta E$ (V, $E_{\text{OER}} - E_{\text{ORR}}$ ) | Ref       |
|--------------------------------------------------------------------------------------------------------------------|---------------------------------------------------|---------------------------------------------------|----------------------------------------------------|-----------|
| LSF0.95/C                                                                                                          | 0.66 vs. RHE                                      | 1.70 vs. RHE                                      | 1.04                                               | this work |
| Pt/C                                                                                                               | 0.89 vs. RHE                                      | 1.99 vs. RHE                                      | 1.10                                               | this work |
| RuO <sub>2</sub>                                                                                                   | 0.55 vs. RHE                                      | 1.67 vs. RHE                                      | 1.12                                               | this work |
| IrO <sub>2</sub>                                                                                                   | 0.38 vs. RHE                                      | 1.70 vs. RHE                                      | 1.32                                               | S1        |
| L0.95FeO <sub>3</sub>                                                                                              | 0.58 vs. RHE                                      | 1.64 vs. RHE                                      | 1.06                                               | S2        |
| La <sub>0.6</sub> Sr <sub>0.4</sub> CoO <sub>3-δ</sub> -ball milled                                                | -0.19 vs. Hg/HgO                                  | 0.89 vs. Hg/HgO                                   | 1.08                                               | S3        |
| CaMnO <sub>2.77</sub> nanoparticle                                                                                 | 0.86 vs. RHE                                      | >1.95 vs. RHE                                     | >1.09                                              | S4        |
| BaTiO <sub>3-x</sub>                                                                                               | 0.72 vs. RHE                                      | >1.90 vs. RHE                                     | >1.18                                              | S5        |
| La <sub>0.58</sub> Sr <sub>0.4</sub> Co <sub>0.2</sub> Fe <sub>0.8</sub> O <sub>3-δ</sub> /nitrogen-doped graphene | 0.67 vs. RHE                                      | 1.72 vs. RHE                                      | 1.05                                               | S6        |
| LaNi <sub>0.85</sub> Mg <sub>0.15</sub> O <sub>3</sub>                                                             | -0.31 vs. SCE                                     | 0.84 vs. SCE                                      | 1.15                                               | S7        |
| LaTi <sub>0.65</sub> Fe <sub>0.35</sub> O <sub>3-δ</sub> /nitrogen-doped carbon nanorods                           | 0.78 vs. RHE                                      | 1.81 vs. RHE                                      | 1.03                                               | S8        |

## References:

- S1. Rincón, R. A.; Masa, J.; Mehrpour, S.; Tietz, F.; Schuhmann, W. Activation of oxygen evolving perovskites for oxygen reduction by functionalization with Fe-N x/C groups. *Chem. Commun* 2014, 50, 14760-14762.
- S2. Zhu, y. l.; Zhou, W.; Yu, J.; Chen, Y. B.; Liu, M. L.; Shao, Z. P., Enhancing Electrocatalytic Activity of Perovskite Oxides by Tuning Cation Deficiency for Oxygen Reduction and Evolution Reactions. *Chem. Mater.* 2016, 28, 1691-1697.
- S3. Oh, M. Y.; Jeon, J. S.; Lee, J. J.; Kim, P.; Nahm, K. S.; The bifunctional electrocatalytic activity of perovskite La<sub>0.6</sub>Sr<sub>0.4</sub>CoO<sub>3-δ</sub> for oxygen reduction and evolution reactions. *RSC Adv.* 2015, 5, 19190-19198.
- S4. Du, J. Zhang, T. R.; Cheng, F. Y.; Chu, W. S.; Wu, Z. Y.; Chen, J.; Nonstoichiometric perovskite CaMnO<sub>3-δ</sub> for oxygen electrocatalysis with high activity. *Inorg. Chem.* 2014, 53, 9106-9114.
- S5. Chen, C.-F.; King, G.; Dickerson, R. M.; Papin, P. A.; Gupta, S.; Kellogg, W. R.; Wu, G. Oxygen-deficient BaTiO<sub>3-x</sub> perovskite as an efficient bifunctional oxygen electrocatalyst. *Nano Energy* 2015, 13, 423-432.
- S6. Park, H. W.; Lee, D. U.; Zamani, P.; Seo, M. H.; Nazar, L. F.; Chen, Z. W. Electrospun porous nanorod perovskite oxide/nitrogen-doped graphene composite as a bi-functional catalyst for metal air batteries. *Nano Energy* 2014, 10, 192-200.
- S7. Du, Z. Z.; Yang, P.; Wang, L. ; Lu, Y. H.; Goodenough, J. B.; Zhang, J.; Zhang, D. W. Electrocatalytic performances of LaNi<sub>1-x</sub>Mg<sub>x</sub>O<sub>3</sub> perovskite oxides as bi-functional catalysts for lithium air batteries. *J. Power Sources* 2014, 265, 91-96.
- S8. Prabu, M.; Ramakrishnan, P.; Ganesan, P.; Manthiram A.; Shanmugam, S. LaTi<sub>0.65</sub>Fe<sub>0.35</sub>O<sub>3-δ</sub> nanoparticle-decorated nitrogen-doped carbon nanorods as an advanced hierarchical air electrode for rechargeable metal-air batteries. *Nano Energy* 2015, 15, 92-103.
